# Supplementary material
Source: HighWire-hosted journal article supplement (https://jnm.snmjournals.org/highwire/filestream/103959/field_highwire_adjunct_files/0/254490_Supplemental_Data.pdf)
Supplement: 254490_Supplemental_Data.pdf [file 254490_Supplemental_Data.pdf]

Reference: Cerebral White Matter

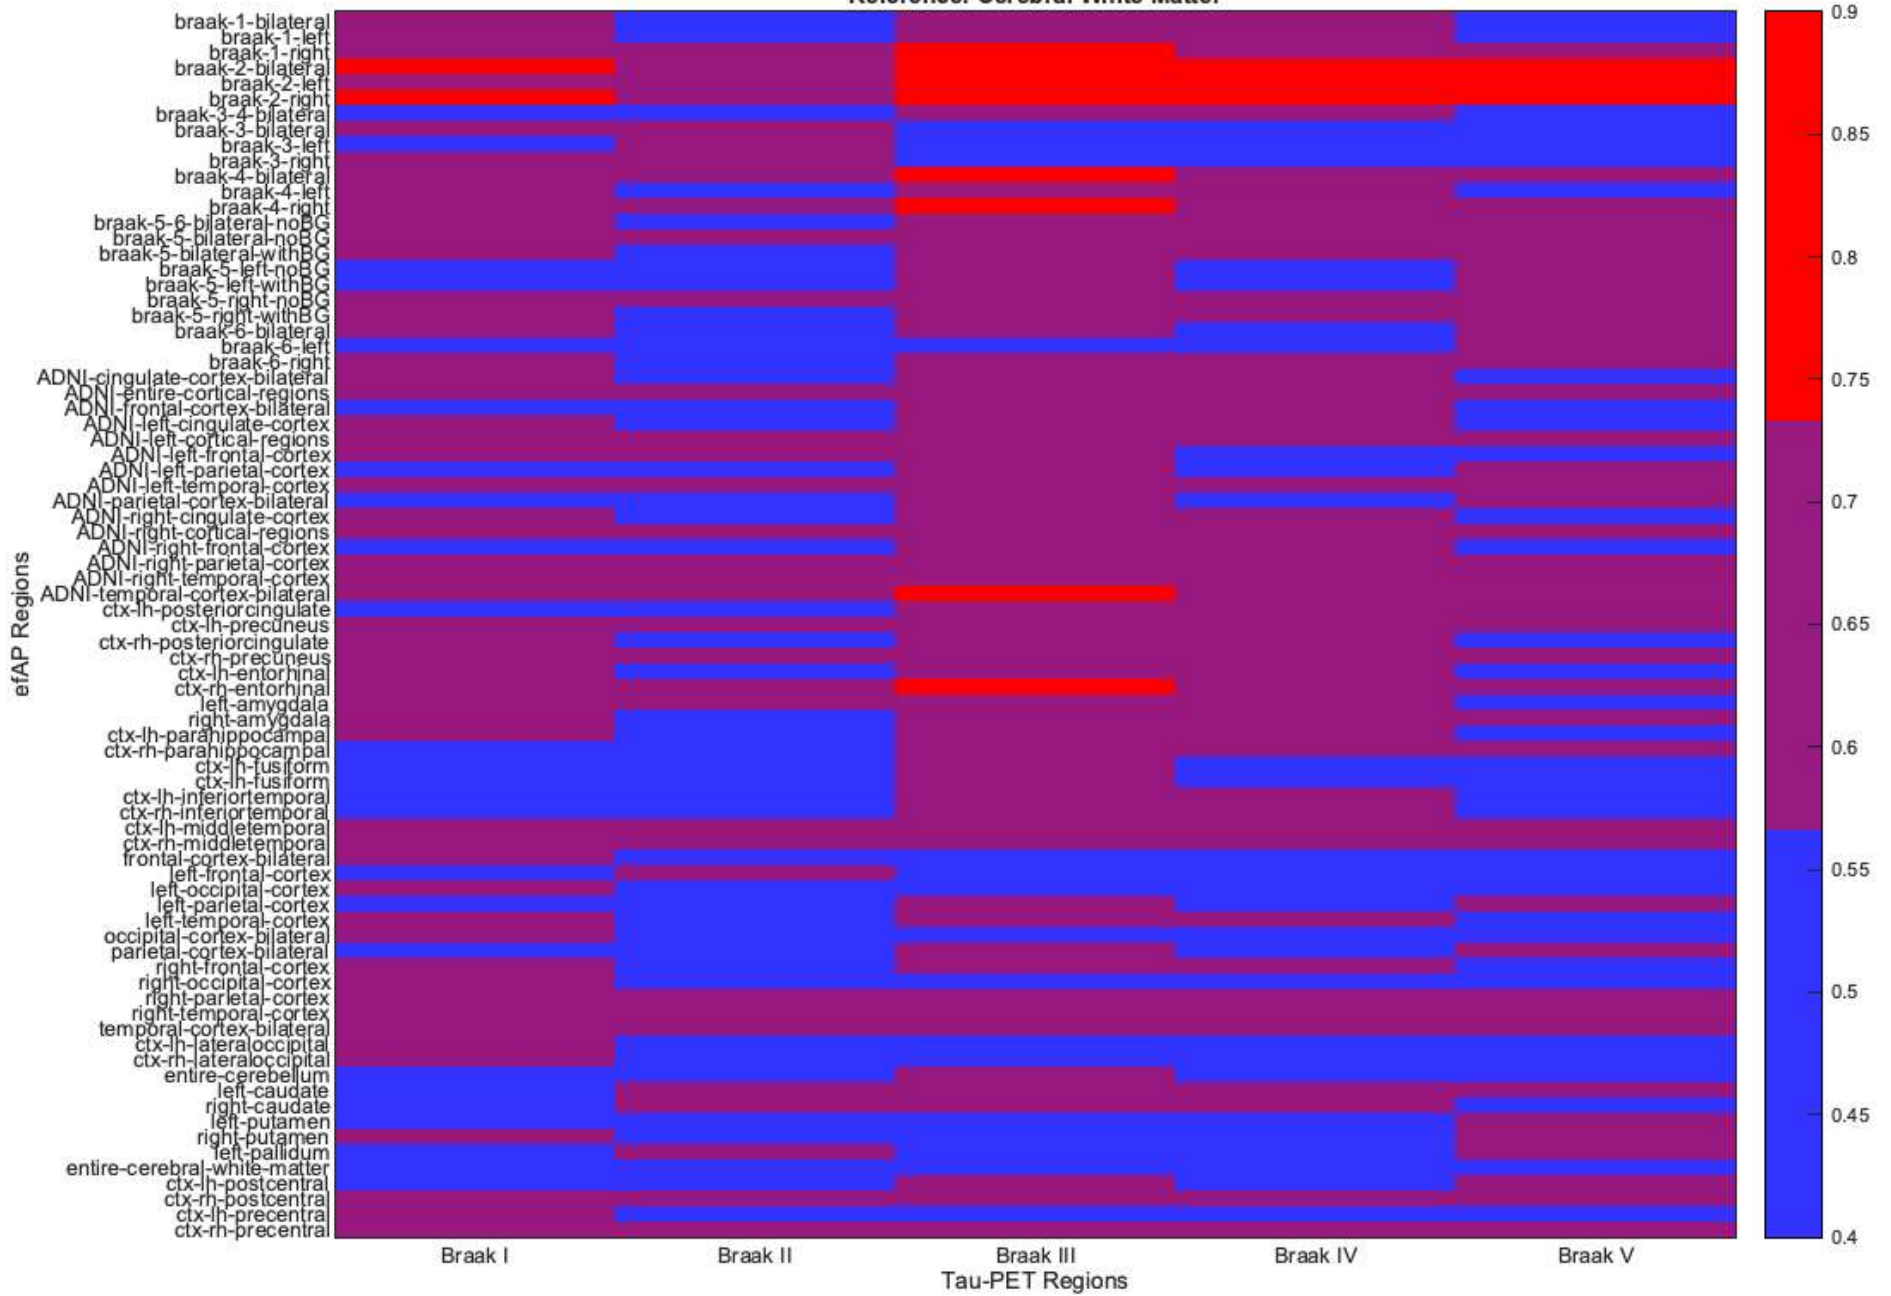

**SUPPLEMENTAL FIGURE 1. efAP Braak II region (hippocampus) chosen as optimum target region.** Area under the curve (AUC) was used to test the performance of the receiver operating characteristics (ROC) curve. AUC between the 79 efAP target regions being used as the predictor variable and tau PET Braak regions as the outcome variable. The color scale shows ranges of AUC values in the tables with blue being lowest, purple intermediate, and red highest.

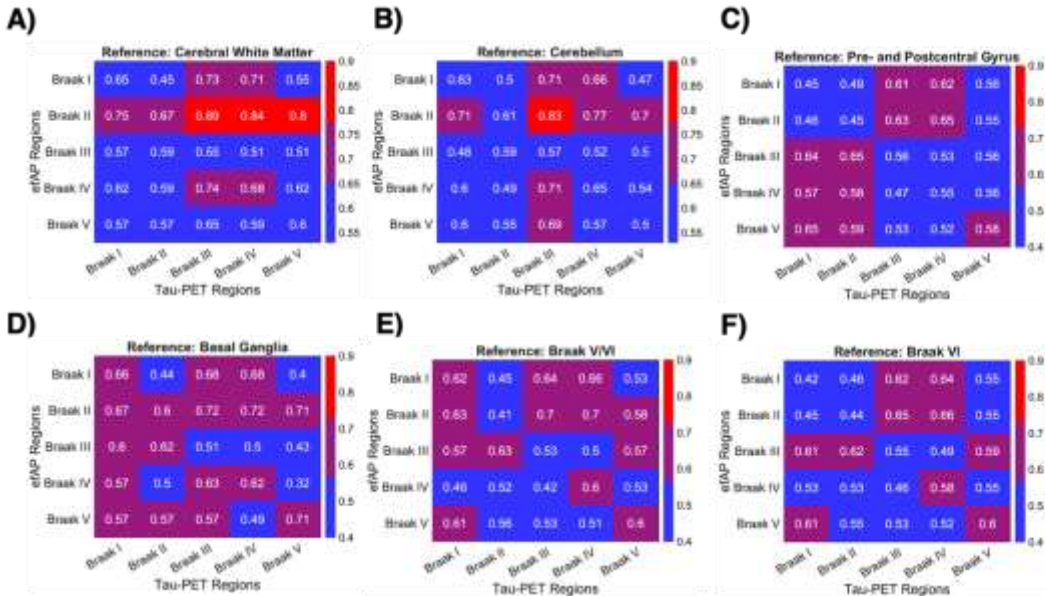

**SUPPLEMENTAL FIGURE 2. efAP cerebral white matter chosen as optimum reference region.** Area under the curve (AUC) was used to test the performance of the receiver operating characteristics (ROC) curve. AUC between the first 5 tau PET Braak regions shown for efAP being used as the predictor variable and tau PET as the outcome variable. Different reference regions for the calculation of efAP were compared: (A) cerebral white matter, (B) cerebellum, (C) pre- and postcentral gyrus, (D) basal ganglia, (E) tau PET Braak V and VI, and (F) Braak VI. The cerebral white matter showed the strongest AUC across efAP in Braak II target region, also known as the hippocampus. The color scale shows ranges of AUC values in the tables with blue being lowest, purple intermediate, and red highest.

## Optimization of Early-Phase Interval

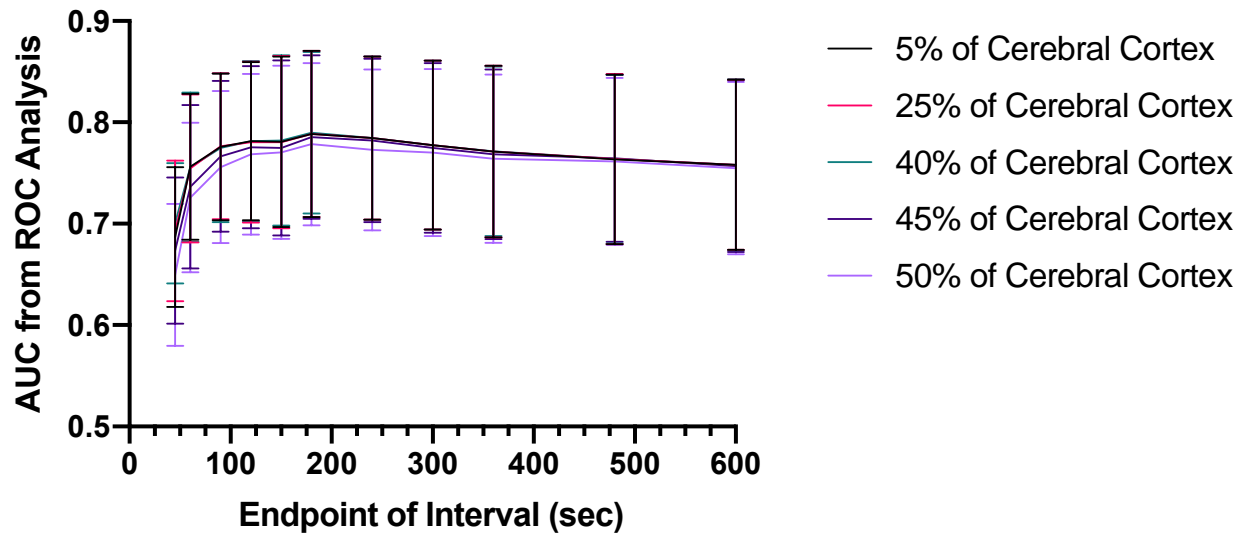

**SUPPLEMENTAL FIGURE 3. First 180 seconds chosen as ideal efAP interval.** Representative data from early-phase optimization of efAP shown from 5 different start points based on peak cerebral cortex activity across 11 duration intervals. Area under the curve (AUC) were measured from receiver operating characteristics (ROC) curves when using efAP as predictor and tau PET Braak regions I – V as the outcome variable (mean  $\pm$  standard deviation across 5 Braak regions).

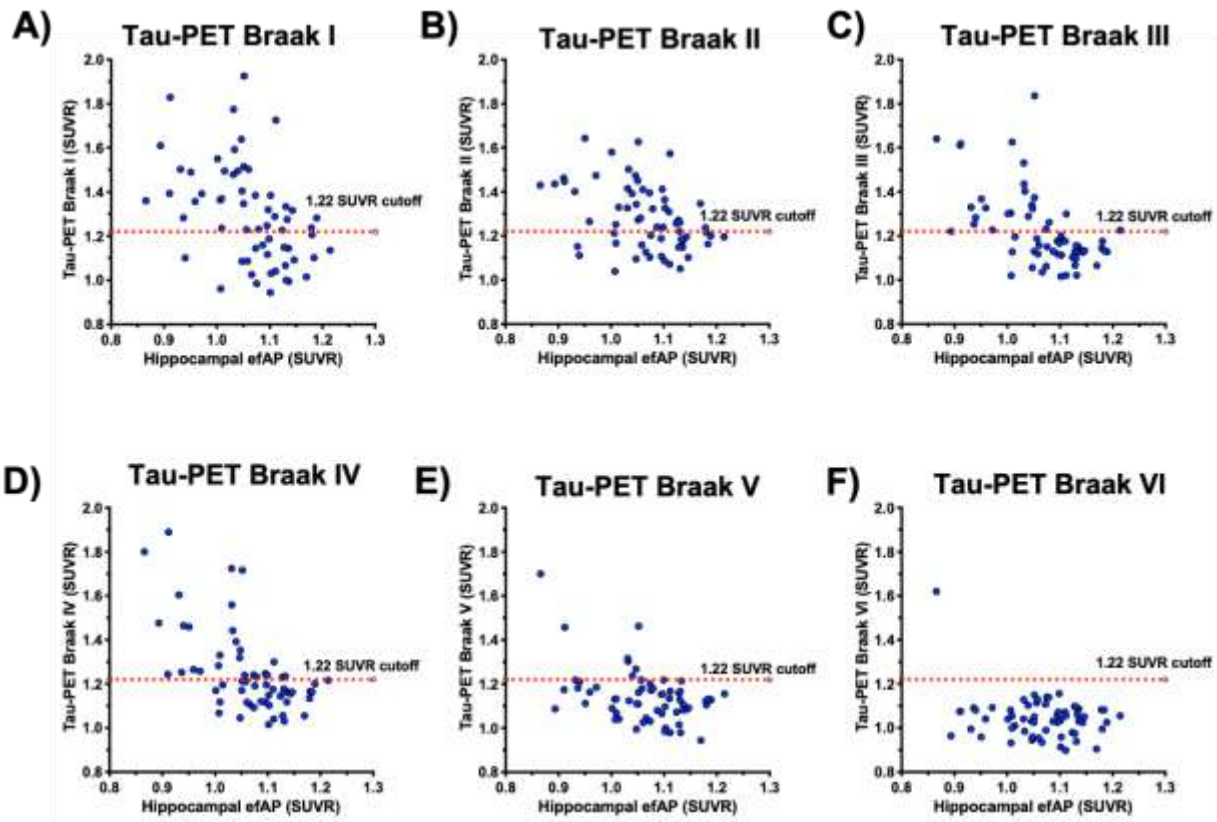

**SUPPLEMENTAL FIGURE 4. Hippocampal efAP significantly correlated with tau PET Braak regions I through V.** Comparison of efAP and flortaucipir-PET across the regions representing the pathological tau PET Braak stages for amyloid-positive participants. (A) through (F) represent the regions for Braak stages I through VI, respectively. Univariate Pearson correlation showed significant correlations with Braak regions I through V ( $r = -0.50, -0.43, -0.58, -0.66, \text{ and } -0.48, P < 0.001$ ). Note that only 1 individual in the study was tau-PET positive in Braak VI, preventing meaningful correlation with efAP.

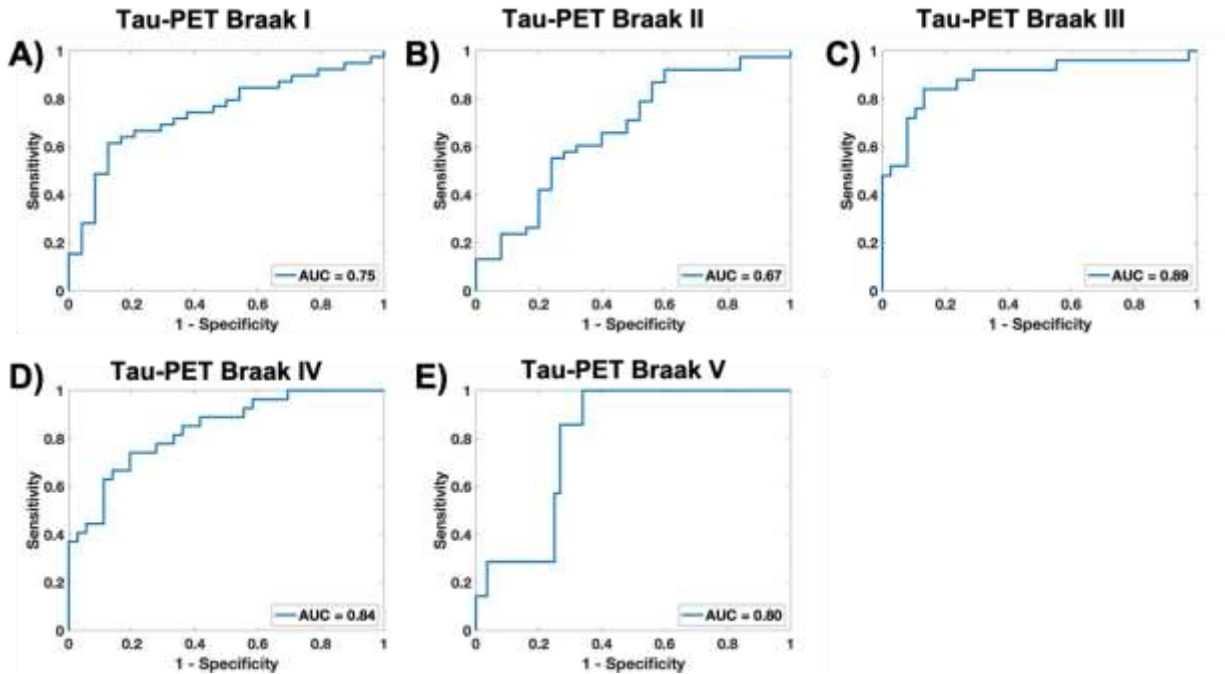

**SUPPLEMENTAL FIGURE 5. Hippocampal efAP predicts tau positivity tau PET Braak regions.** Receiver operating characteristics (ROC) curve performed using efAP as predictor variable and tau PET Braak region as the outcome variable. (A) through (E) represent the regions for Braak stages I through V, respectively. Area under the curve (AUC) shown for each of the five relationships. Since only one subject was tau-positive in region corresponding to Braak VI, ROC curve not shown.
